# Supplementary material
Source: publisher figshare collection journal article supplement (https://acs.figshare.com/ndownloader/files/21005805)
Supplement: Supplementary file 1 [file 21005805]

## Sheet: label-free
supplemental_table_03
id_supplemental_table_01	sample_type	time_point	mean_ratio	mean_intensity_control	cv_control	mean_intensity_cetuximab	cv_cetuximab	peptides	p_value	q_value	majority_protein_IDs	gene_names	protein_names
19943	proteome	24	1.66191	2.87448e+07	0.0645641	4.77733e+07	0.108798	15	0.000234013	0.0144153	O15164	TRIM24	Transcription intermediary factor 1-alpha
19980	proteome	24	0.549315	9.39572e+07	0.0561003	5.16119e+07	0.118573	11	0.000103973	0.00937273	O43175	PHGDH	D-3-phosphoglycerate dehydrogenase
19988	proteome	24	2.01058	5.98273e+07	0.159361	1.20295e+08	0.147219	3	0.000702215	0.0285209	O43291	SPINT2	Kunitz-type protease inhibitor 2
20002	proteome	24	1.76475	3.50279e+07	0.112863	6.18127e+07	0.175209	13	0.00179197	0.0456042	O43490	PROM1	Prominin-1
20055	proteome	24	1.68148	1.00596e+08	0.0471505	1.69147e+08	0.0851818	34	3.72967e-05	0.00668603	O60437	PPL	Periplakin
20174	proteome	24	3.70977	8.14114e+06	0.188579	3.02011e+07	0.0605477	7	9.79828e-06	0.0043602	O76027	ANXA9	Annexin A9
20224	proteome	24	0.611876	9.31337e+07	0.0900781	5.69898e+07	0.0376399	19	6.26297e-05	0.00770882	O95340	PAPSS2	Bifunctional 3-phosphoadenosine 5-phosphosulfate synthase 2;Sulfate adenylyltransferase;Adenylyl-sulfate kinase
20228	proteome	24	0.615206	6.73232e+07	0.0261426	4.14164e+07	0.0331326	11	4.39471e-07	0.000541432	O95361	TRIM16	Tripartite motif-containing protein 16
20313	proteome	24	0.467361	6.08941e+07	0.205029	2.84594e+07	0.17372	6	0.00161637	0.0445832	P04183	TK1	Thymidine kinase, cytosolic
20375	proteome	24	0.63113	1.89094e+07	0.0734132	1.19342e+07	0.0729483	9	0.000122854	0.0105598	P07942	LAMB1	Laminin subunit beta-1
20385	proteome	24	0.0773036	1.45516e+08	0.0970784	1.12491e+07	0.360597	15	8.67561e-06	0.0043602	P08243	ASNS	Asparagine synthetase [glutamine-hydrolyzing]
20387	proteome	24	1.71201	1.49759e+09	0.0980242	2.56391e+09	0.0858912	42	0.000184009	0.0129979	P08473	MME	Neprilysin
20437	proteome	24	1.93636	2.17434e+08	0.062763	4.21045e+08	0.0688649	14	7.37327e-06	0.0043602	P10619	CTSA	Lysosomal protective protein;Lysosomal protective protein 32 kDa chain;Lysosomal protective protein 20 kDa chain
20445	proteome	24	0.576193	1.08551e+08	0.0854032	6.25454e+07	0.172107	7	0.000976248	0.0351145	P11166	SLC2A1	Solute carrier family 2, facilitated glucose transporter member 1
20614	proteome	24	3.07303	7.2936e+06	0.154441	2.24125e+07	0.215777	12	0.000187232	0.0129979	P21860	ERBB3	Receptor tyrosine-protein kinase erbB-3
20637	proteome	24	0.596973	6.10578e+08	0.107869	3.64489e+08	0.0614389	22	0.000222685	0.0139498	P23381	WARS	Tryptophan--tRNA ligase, cytoplasmic;T1-TrpRS;T2-TrpRS
20644	proteome	24	1.93802	1.08747e+08	0.0211441	2.10756e+08	0.0494455	27	2.77632e-07	0.000541432	P23634	ATP2B4	Plasma membrane calcium-transporting ATPase 4
20739	proteome	24	1.70695	2.82813e+09	0.0519342	4.8274e+09	0.0761507	27	2.46417e-05	0.00630483	P30837	ALDH1B1	Aldehyde dehydrogenase X, mitochondrial
20747	proteome	24	0.204366	5.79016e+07	0.0815854	1.18329e+07	0.290652	15	4.80176e-05	0.00709884	P31350	RRM2	Ribonucleoside-diphosphate reductase subunit M2
20840	proteome	24	5.21939	8.8191e+06	0.244484	4.60309e+07	0.0584063	8	1.11792e-05	0.0043602	P40879	SLC26A3	Chloride anion exchanger
21017	proteome	24	2.71278	7.13558e+06	0.0504075	1.93576e+07	0.299965	7	0.00179131	0.0456042	P51178	PLCD1	1-phosphatidylinositol 4,5-bisphosphate phosphodiesterase delta-1
21056	proteome	24	0.41986	1.15483e+08	0.0293658	4.84872e+07	0.169273	25	5.07914e-05	0.00722016	P52789	HK2	Hexokinase-2
21093	proteome	24	4.64929	4.6855e+07	0.267046	2.17841e+08	0.0812003	10	5.88654e-05	0.00770882	P54855	UGT2B15	UDP-glucuronosyltransferase 2B15
21117	proteome	24	1.91435	2.32608e+07	0.154151	4.45308e+07	0.0751542	5	0.000204579	0.0130367	P55899	FCGRT	IgG receptor FcRn large subunit p51
21254	proteome	24	0.632802	4.52621e+07	0.0854754	2.86414e+07	0.104521	8	0.000528032	0.023607	P62993	GRB2	Growth factor receptor-bound protein 2
21286	proteome	24	1.83949	3.60251e+07	0.204514	6.62676e+07	0.120122	8	0.00196725	0.0468994	P78310	CXADR	Coxsackievirus and adenovirus receptor
21297	proteome	24	0.399836	8.92611e+06	0.104895	3.56903e+06	0.10775	3	1.92992e-05	0.00630483	P78504	JAG1	Protein jagged-1
21363	proteome	24	1.76023	3.692e+07	0.0998365	6.49848e+07	0.0827967	9	0.000132791	0.0111545	Q02252	ALDH6A1	Methylmalonate-semialdehyde dehydrogenase [acylating], mitochondrial
21377	proteome	24	0.509086	3.59229e+07	0.068306	1.82881e+07	0.193011	6	0.000897759	0.0333378	Q03518	TAP1	Antigen peptide transporter 1
21378	proteome	24	0.629432	1.41373e+07	0.0552521	8.89831e+06	0.151134	2	0.00120645	0.0388052	Q03519	TAP2	Antigen peptide transporter 2
21478	proteome	24	0.575255	1.59392e+08	0.0299632	9.16925e+07	0.10295	47	3.91895e-05	0.00668603	Q13085	ACACA	Acetyl-CoA carboxylase 1;Biotin carboxylase
21603	proteome	24	0.471102	5.65569e+07	0.049655	2.66439e+07	0.0435693	28	4.28253e-07	0.000541432	Q14517	FAT1	Protocadherin Fat 1;Protocadherin Fat 1, nuclear form
21710	proteome	24	0.583476	4.47753e+07	0.151955	2.61245e+07	0.13802	16	0.00171301	0.0455487	Q15582	TGFBI	Transforming growth factor-beta-induced protein ig-h3
21763	proteome	24	0.348751	4.68161e+07	0.11218	1.63264e+07	0.115994	13	1.1797e-05	0.0043602	Q16850	CYP51A1	Lanosterol 14-alpha demethylase
21793	proteome	24	1.65361	9.02565e+06	0.131154	1.49247e+07	0.0435641	4	0.000394812	0.0197192	Q3ZCW2	LGALSL	Galectin-related protein
21803	proteome	24	2.00491	1.78779e+08	0.172828	3.58426e+08	0.121488	15	0.000729474	0.0293061	Q53EL6	PDCD4	Programmed cell death protein 4
21891	proteome	24	1.64383	2.60486e+07	0.144499	4.28206e+07	0.0783855	12	0.000785398	0.0305627	Q68CZ2	TNS3	Tensin-3
21943	proteome	24	1.76366	1.43502e+08	0.107328	2.53077e+08	0.108812	19	0.000326024	0.0179848	Q6PCE3	PGM2L1	Glucose 1,6-bisphosphate synthase
21952	proteome	24	0.507829	4.00278e+07	0.0822474	2.03271e+07	0.134169	19	0.000172596	0.0129979	Q6PL18	ATAD2	ATPase family AAA domain-containing protein 2
21954	proteome	24	0.611689	5.15154e+07	0.112775	3.1512e+07	0.146585	11	0.00180697	0.0456042	Q6RFH5	WDR74	WD repeat-containing protein 74
22081	proteome	24	0.617714	2.14429e+07	0.0963032	1.32455e+07	0.129532	7	0.00102731	0.0354083	Q8IUF8	MINA	Bifunctional lysine-specific demethylase and histidyl-hydroxylase MINA
22123	proteome	24	0.135508	4.66541e+07	0.157785	6.32178e+06	0.309887	18	8.28285e-05	0.00824192	Q8IZW8	TNS4	Tensin-4
22228	proteome	24	2.35147	3.29255e+07	0.0868951	7.74252e+07	0.171502	10	0.000106842	0.00940213	Q8TAV3	CYP2W1	Cytochrome P450 2W1
22244	proteome	24	0.538536	5.63339e+07	0.102444	3.03375e+07	0.157232	12	0.00053347	0.023607	Q8TD30	GPT2	Alanine aminotransferase 2
22285	proteome	24	1.51558	8.48947e+08	0.0275819	1.28659e+09	0.034855	30	1.58774e-06	0.00146708	Q8WVV4	POF1B	Protein POF1B
22327	proteome	24	1.91271	2.29465e+08	0.197224	4.38895e+08	0.0792216	11	0.000829182	0.0315946	Q92597	NDRG1	Protein NDRG1
22508	proteome	24	2.1424	2.099e+07	0.137835	4.49713e+07	0.0627998	7	4.60426e-05	0.00709884	Q96KN4	FAM84A	Protein FAM84A
22732	proteome	24	3.60078	8.97699e+06	0.23001	3.23239e+07	0.328506	3	0.00189727	0.0461342	Q9BXS4	TMEM59	Transmembrane protein 59
22768	proteome	24	1.50978	1.05883e+08	0.0988902	1.59856e+08	0.0900254	4	0.000768529	0.0305428	Q9C002	NMES1	Normal mucosa of esophagus-specific gene 1 protein
22802	proteome	24	1.54342	2.34113e+07	0.0888531	3.61327e+07	0.11107	14	0.00102986	0.0354083	Q9H0H5	RACGAP1	Rac GTPase-activating protein 1
22840	proteome	24	2.14123	5.82992e+08	0.199706	1.24828e+09	0.125828	12	0.0005332	0.023607	Q9H3R2	MUC13	Mucin-13
22898	proteome	24	1.8478	5.28317e+07	0.0983341	9.76218e+07	0.167587	13	0.00105429	0.0355407	Q9H9S4	CAB39L	Calcium-binding protein 39-like
23032	proteome	24	1.78613	5.24096e+06	0.0777105	9.3608e+06	0.112219	4	0.000178838	0.0129979	Q9NUV7	SPTLC3	Serine palmitoyltransferase 3
23277	proteome	24	0.328342	5.6506e+07	0.11726	1.85537e+07	0.200697	14	6.1307e-05	0.00770882	Q9ULW0	TPX2	Targeting protein for Xklp2
23278	proteome	24	0.515373	2.70946e+07	0.102311	1.39639e+07	0.151881	4	0.000379394	0.0194754	Q9ULX3	NOB1	RNA-binding protein NOB1
23399	proteome	24	1.52931	2.12889e+07	0.110548	3.25578e+07	0.104692	11	0.00164407	0.0450109	Q9Y3M8	STARD13	StAR-related lipid transfer protein 13
23420	proteome	24	0.353267	3.97073e+07	0.107581	1.4027e+07	0.15248	22	2.47588e-05	0.00630483	Q9Y4H2	IRS2	Insulin receptor substrate 2
23446	proteome	24	0.587005	8.56648e+07	0.0846271	5.02841e+07	0.0442683	12	3.10535e-05	0.00668603	Q9Y5S8	NOX1	NADPH oxidase 1

## Sheet: silac
supplemental_table_03
id_supplemental_table_01	sample_type	time_point	mean_ratio	mean_intensity_control	cv_control	mean_intensity_cetuximab	cv_cetuximab	peptides	p_value	q_value	majority_protein_IDs	gene_names	protein_names
10372	proteome	24	1.54643	0.737213	0.0492666	1.14005	0.0471278	4	0.000383336	0.01078	O43490	PROM1	Prominin-1
10400	proteome	24	1.75325	0.870242	0.106309	1.52576	0.122658	5	0.0040879	0.0383976	O60437	PPL	Periplakin
10493	proteome	24	0.660087	1.04441	0.0746638	0.6894	0.0286058	6	0.000798491	0.0173491	O95340	PAPSS2	Bifunctional 3-phosphoadenosine 5-phosphosulfate synthase 2;Sulfate adenylyltransferase;Adenylyl-sulfate kinase
10524	proteome	24	1.85308	0.819203	0.13771	1.51805	0.057117	10	0.000153193	0.00610215	P00326	ADH1C	Alcohol dehydrogenase 1C
10581	proteome	24	0.654186	1.19141	0.0579771	0.779402	0.0432149	5	2.38974e-05	0.0029573	P06731	CEACAM5	Carcinoembryonic antigen-related cell adhesion molecule 5
10613	proteome	24	0.211538	1.62847	0.0990203	0.344484	0.408669	7	0.000341665	0.0104563	P08243	ASNS	Asparagine synthetase [glutamine-hydrolyzing]
10615	proteome	24	1.50402	0.842019	0.0859445	1.26641	0.0746373	36	0.000385896	0.01078	P08473	MME	Neprilysin
10654	proteome	24	1.62493	0.840867	0.0193498	1.36635	0.0146002	9	1.60546e-08	3.45334e-05	P10619	CTSA	Lysosomal protective protein;Lysosomal protective protein 32 kDa chain;Lysosomal protective protein 20 kDa chain
10661	proteome	24	0.472927	1.10582	0.0747429	0.522969	0.0526584	5	2.88981e-06	0.000621598	P11166	SLC2A1	Solute carrier family 2, facilitated glucose transporter member 1
10693	proteome	24	0.629702	1.34276	0.0957697	0.845541	0.112535	5	0.000757583	0.0171532	P13688	CEACAM1	Carcinoembryonic antigen-related cell adhesion molecule 1
10701	proteome	24	1.57022	0.70833	0.171784	1.11224	0.082926	2	0.00231782	0.0269755	P13987	CD59	CD59 glycoprotein
10815	proteome	24	1.89914	0.995662	0.148732	1.89091	0.0685515	6	0.000201196	0.00743928	P23634	ATP2B4	Plasma membrane calcium-transporting ATPase 4
10835	proteome	24	0.626194	1.35693	0.159108	0.849699	0.0505139	2	0.00171822	0.0242078	P25815	S100P	Protein S100-P
10891	proteome	24	1.53769	0.835801	0.0484361	1.28521	0.0281757	25	4.74613e-06	0.000864937	P30837	ALDH1B1	Aldehyde dehydrogenase X, mitochondrial
11061	proteome	24	0.605411	1.06261	0.0442983	0.643315	0.112606	5	0.000142797	0.00579547	P49773	HINT1	Histidine triad nucleotide-binding protein 1
11311	proteome	24	0.471396	0.969409	0.119274	0.456976	0.257861	2	0.00248966	0.0280377	P78504	JAG1	Protein jagged-1
11608	proteome	24	0.635158	1.14899	0.0285013	0.729792	0.0902942	3	6.83062e-05	0.00391504	Q16880	UGT8	2-hydroxyacylsphingosine 1-beta-galactosyltransferase
11625	proteome	24	1.67598	0.807985	0.103378	1.35416	0.095225	9	0.00030739	0.00958253	Q53EL6	PDCD4	Programmed cell death protein 4
11680	proteome	24	2.16956	0.655205	0.168093	1.42151	0.128667	12	0.000345144	0.0104563	Q6PCE3	PGM2L1	Glucose 1,6-bisphosphate synthase
11755	proteome	24	0.259218	1.0302	0.0620824	0.267048	0.0760771	8	1.55478e-06	0.000582488	Q8IZW8	TNS4	Tensin-4
11843	proteome	24	1.57292	1.07663	0.194758	1.69345	0.0782407	8	0.00464344	0.0410625	Q92597	NDRG1	Protein NDRG1
11964	proteome	24	1.59227	0.861859	0.0748371	1.37231	0.0373626	5	3.08326e-05	0.00315178	Q99519	NEU1	Sialidase-1
12081	proteome	24	0.652117	1.21166	0.074701	0.790141	0.135887	13	0.00154835	0.0234011	Q9H223	EHD4	EH domain-containing protein 4
12090	proteome	24	1.84732	0.858561	0.0267539	1.58604	0.0573562	9	1.10451e-06	0.000582488	Q9H3R2	MUC13	Mucin-13
12198	proteome	24	0.485731	1.13842	0.0824793	0.552967	0.00354962	4	0.00651688	0.0498854	Q9NYT0	PLEK2	Pleckstrin-2
12378	proteome	24	0.661966	1.0406	0.0684881	0.688845	0.0326335	8	4.04455e-05	0.00322215	Q9Y5M8	SRPRB	Signal recognition particle receptor subunit beta
12387	proteome	24	0.587348	1.20537	0.138394	0.707972	0.0789185	14	0.00050143	0.0129949	Q9Y617	PSAT1	Phosphoserine aminotransferase

## Sheet: tmt
supplemental_table_03
id_supplemental_table_01	sample_type	time_point	mean_ratio	mean_intensity_control	cv_control	mean_intensity_cetuximab	cv_cetuximab	peptides	p_value	q_value	majority_protein_IDs	gene_names	protein_names
2256	proteome	3	6.04574	0.600664	0.0669685	3.63146	0.057323	8	1.341e-08	2.66058e-05	P01857	IGHG1	Ig gamma-1 chain C region
4071	proteome	24	1.53667	0.824811	0.0823892	1.26746	0.0215531	2	0.000879691	0.0436326	O43291	SPINT2	Kunitz-type protease inhibitor 2
4239	proteome	24	3.05144	0.709162	0.101714	2.16397	0.135674	5	0.000383751	0.0262536	P01834	IGKC	Ig kappa chain C region
4240	proteome	24	5.24619	0.503042	0.0584813	2.63905	0.0608625	8	1.80996e-08	3.59098e-05	P01857	IGHG1	Ig gamma-1 chain C region
4315	proteome	24	0.497901	1.36719	0.0325803	0.680727	0.0725298	7	2.59072e-06	0.00256998	P08243	ASNS	Asparagine synthetase [glutamine-hydrolyzing]
